# Supplementary material for: The Genetic Control of SEEDSTICK and LEUNIG-HOMOLOG in Seed and Fruit Development: New Insights into Cell Wall Control
Source: MDPI journal article supplement (doi:10.3390/plants11223146), 2022-11-17
Supplement: s1 [file s1]

Table S1: T-DNA insertion lines and corresponding WT used in the work

| Stocks         | Mutated gene    | Locus     | Germplasm             | Lab origin                           | Publication origin               | Link source                                                                                                                       |
|----------------|-----------------|-----------|-----------------------|--------------------------------------|----------------------------------|-----------------------------------------------------------------------------------------------------------------------------------|
| Ws-2           |                 |           |                       | Tamara Western lab, Montreal (CA)    |                                  |                                                                                                                                   |
| <i>bx11-1</i>  | <i>BXL1</i>     | AT5G49360 | CS16299               | Tamara Western lab, Montreal (CA)    | Arsovski <i>et al.</i> , 2009    | <a href="https://www.ncbi.nlm.nih.gov/pmc/articles/PMC2705025/">https://www.ncbi.nlm.nih.gov/pmc/articles/PMC2705025/</a>         |
| Col-0          |                 |           |                       | Own lab, Milan (IT)                  |                                  |                                                                                                                                   |
| <i>cesa5-2</i> | <i>CESA5</i>    | AT5G09870 | SALK_023353           | Chris Somerville lab, Stanford (USA) | Persson <i>et al.</i> , 2007     | <a href="https://pubmed.ncbi.nlm.nih.gov/17878302/">https://pubmed.ncbi.nlm.nih.gov/17878302/</a>                                 |
| <i>fei2-2</i>  | <i>FEI2</i>     | AT2G35620 | CS2106721-SALK_044226 | Joe Kieber lab, Chapel Hill (USA)    | Harpaz-Saad <i>et al.</i> , 2012 | <a href="https://www.ncbi.nlm.nih.gov/pmc/articles/PMC3405700/">https://www.ncbi.nlm.nih.gov/pmc/articles/PMC3405700/</a>         |
| <i>fly1.1</i>  | <i>FLY1</i>     | AT4G28370 | CS67936               | George Haughn lab, Vancouver (CA)    | Voiniciuc <i>et al.</i> , 2013   | <a href="https://pubmed.ncbi.nlm.nih.gov/23482858/">https://pubmed.ncbi.nlm.nih.gov/23482858/</a>                                 |
| <i>fly1.3</i>  | <i>FLY1</i>     | AT4G28370 | SALK_144822           | George Haughn lab, Vancouver (CA)    | Voiniciuc <i>et al.</i> , 2013   | <a href="https://pubmed.ncbi.nlm.nih.gov/23482858/">https://pubmed.ncbi.nlm.nih.gov/23482858/</a>                                 |
| <i>gl2-8</i>   | <i>GL2</i>      | AT1G79840 | SALK_130213C          | NASC collection, Nottingham (UK)     | Western <i>et al.</i> , 2004     | <a href="https://pubmed.ncbi.nlm.nih.gov/14701918/">https://pubmed.ncbi.nlm.nih.gov/14701918/</a>                                 |
| <i>luh-3</i>   | <i>LUH/MUM1</i> | AT2G32700 | SALK_107245C          | NASC collection, Nottingham (UK)     | Saez-Aguayo <i>et al.</i> , 2013 | <a href="https://academic.oup.com/plcell/article/25/1/308/6097743">https://academic.oup.com/plcell/article/25/1/308/6097743</a>   |
| <i>per36-1</i> | <i>PER36</i>    | AT3G50990 | SAIL_194_G03          | Ikuko Hara-Nishimura lab, Kyoto (JP) | Kunieda <i>et al.</i> , 2013     | <a href="https://academic.oup.com/plcell/article/25/4/1355/6100529">https://academic.oup.com/plcell/article/25/4/1355/6100529</a> |
| <i>pmei6-1</i> | <i>PMEI6</i>    | AT2G47670 | SM3.19557             | Helen North lab, Versailles (FR)     | Saez-Aguayo <i>et al.</i> , 2013 | <a href="https://academic.oup.com/plcell/article/25/1/308/6097743">https://academic.oup.com/plcell/article/25/1/308/6097743</a>   |
| <i>stk-2</i>   | <i>STK</i>      | AT4G09960 |                       | Own lab, Milan (IT)                  | Pinyopich <i>et al.</i> , 2003   | <a href="https://pubmed.ncbi.nlm.nih.gov/12840762/">https://pubmed.ncbi.nlm.nih.gov/12840762/</a>                                 |

**Col-0**

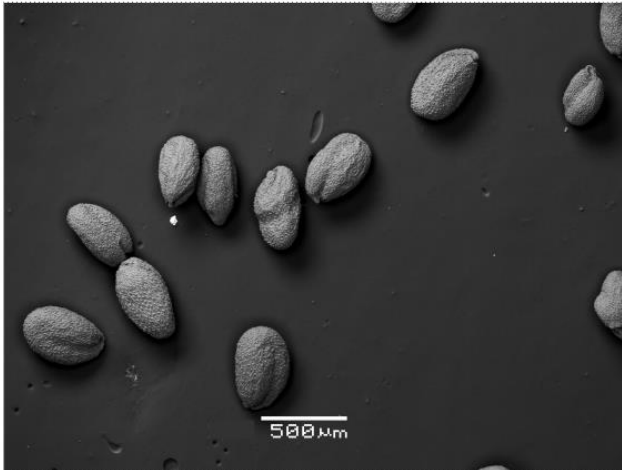

***luh stk***

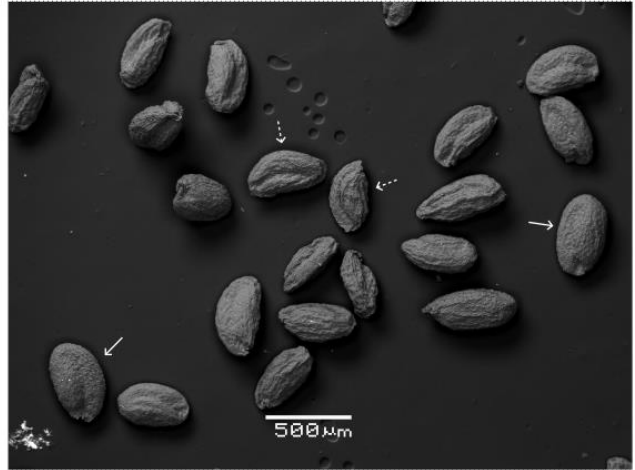

Figure S1: **Scanning Electron Microscopy (SEM) pictures of seeds from Columbia (WT) and *luh stk* double mutant.** In *luh stk* image normal arrows indicate WT-like seeds, dotted arrow indicate seeds with “wrinkled” phenotypes. Scale bar = 500 μm.

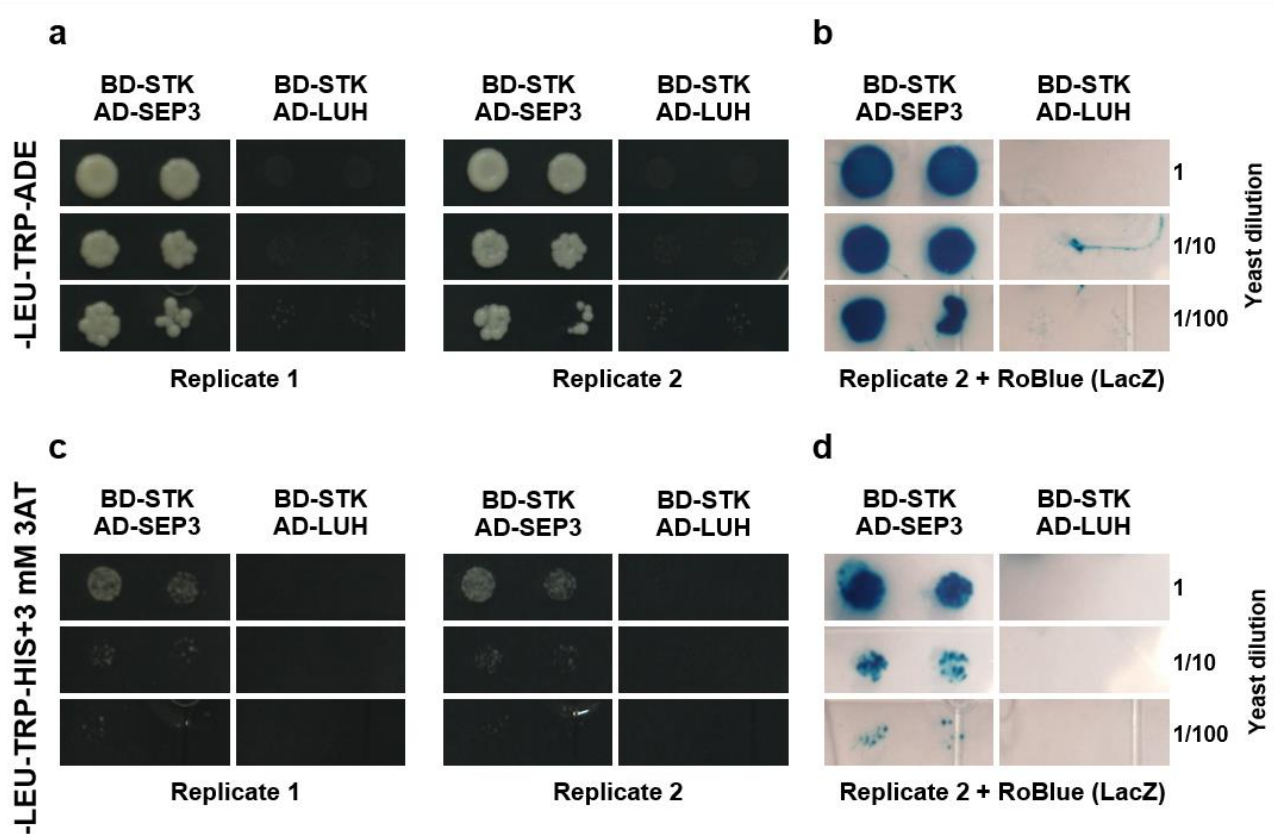

**Figure S2: Yeast Two-Hybrid assay to test the LUH-STK protein interaction.** The direct interaction between STK and LUH was tested using a yeast two-hybrid assay. The interaction STK-SEPALLATA 3 (SEP3) was used as a positive control. Two different colonies were used for the experiments with one technical replicate. Three yeast dilutions were used for the inoculation on the interaction media. The picture shows yeast growth seven days after inoculation and incubation at 22°C.

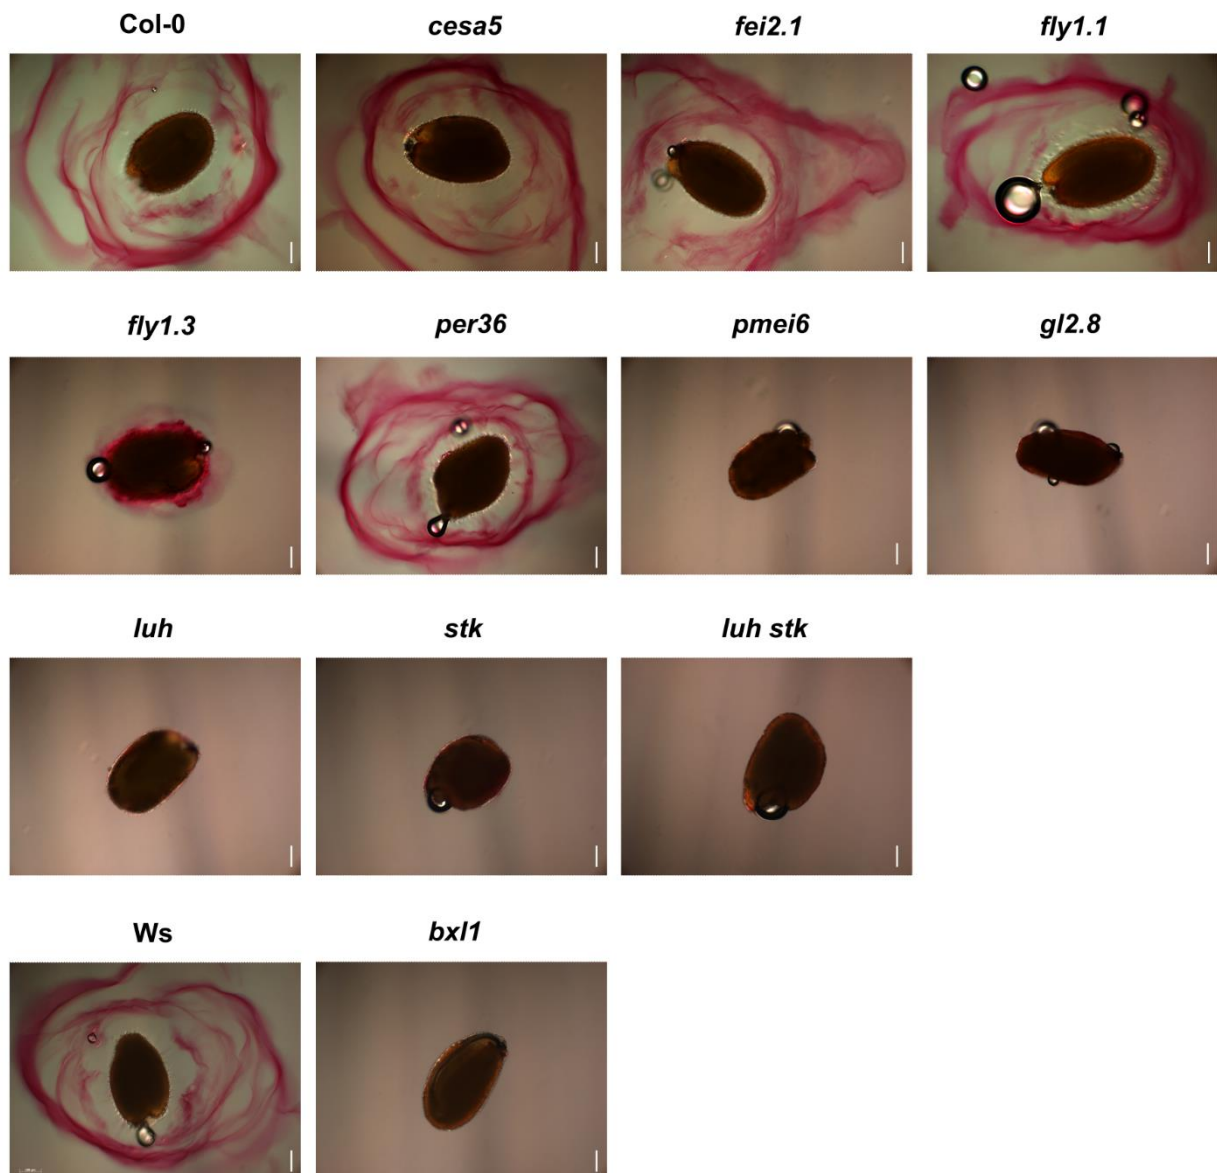

Figure S3: **Ruthenium red staining in seeds from the cell wall mutants for the mucilage extrusion analysis.** Stereomicroscope images of *cesa5*, *fei2.1*, *fly1.1*, *fly1.3*, *per36*, *pmei6*, *gl2.8*, *luh*, *stk*, *luh stk* and *bxl1* compared to the corresponding WT (Col-0 and Ws). Scale bar = 100  $\mu$ m;

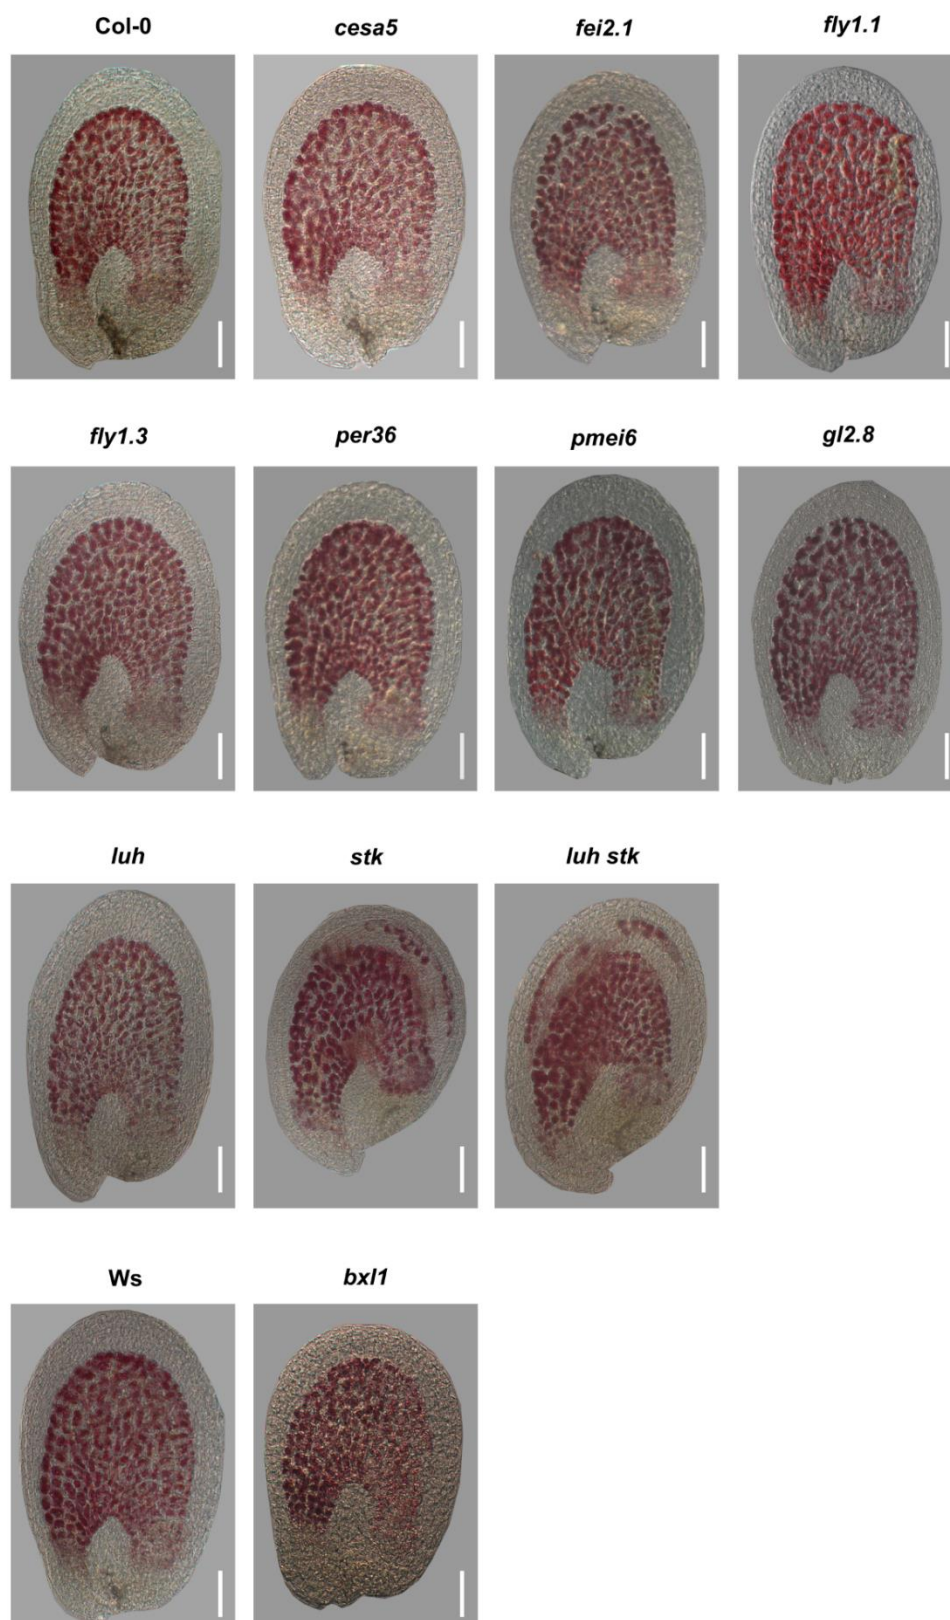

Figure S4: **Vanillin staining in seeds from the cell wall mutants for the proanthocyanidin accumulation analysis.** Microscope images of *cesa5*, *fei2.1*, *fly1.1*, *fly1.3*, *per36*, *pmei6*, *gl2.8*, *luh*, *stk*, *luh stk* and *bxl1* compared to the corresponding WT (Col-0 and Ws). Scale bar = 50  $\mu$ m.
